# Supplementary material
Source: publisher site journal article supplement (https://www.dovepress.com/get_supplementary_file.php?f=236607.docx)
Supplement: Supplementary file 1 [file get_supplementary_file.php]

Supplementary materials

**miR-520b promotes breast cancer stemness through Hippo/YAP signaling pathway**

Hui Zhang1,2*, Ting-yuan Lang3*, Dongling Zou3, Lei Zhou4,5,6, Meng Lou3, Jing-shu Liu7, Yun-zhe Li7, Dong-yan Ding7, Yu-cong Li3,7, Na Zhang3, Xiao-dong Zheng2, Xiao-hua Zeng2, Qi Zhou1,3,8,9#, Li Li1#

**1**Department of Gynecologic Oncology, Affiliated Tumor Hospital of Guangxi Medical University, Nanning 530021, Guangxi, P.R. China.

2Breast cancer center, Chongqing University Cancer Hospital & Chongqing Cancer Institute & Chongqing Cancer Hospital, Chongqing 400030, Chongqing, P.R. China.

**3**Department of Gynecologic Oncology, Chongqing University Cancer Hospital & Chongqing Cancer Institute & Chongqing Cancer Hospital, Chongqing 400030, Chongqing, P.R. China.

4Singapore Eye Research Institute, The academia, 20 College Road, Discovery Tower Level 6, Singapore, 169856, Singapore.

5Department of Ophthalmology, Yong Loo Lin School of Medicine, National University of Singapore, 1E Kent Ridge Road, NUHS Tower Block Level 7, Singapore, 119228, Singapore.

6Ophthalmology and Visual Sciences Academic Clinical Research Program, Duke-NUS Medical School, 8 college Road, Singapore, 169867, Singapore.

**7**Bioengineering College of Chongqing University, Chongqing University, Chongqing 400030, Chongqing, P.R. China

**8**Chongqing Key Laboratory of Translational Research for Cancer Metastasis and Individualized Treatment, Chongqing University Cancer Hospital & Chongqing Cancer Institute & Chongqing Cancer Hospital, Chongqing 400030, Chongqing, P.R. China.

**9**Key Laboratory for Biorheological Science and Technology of Ministry of Education (Chongqing University), Chongqing University Cancer Hospital & Chongqing Cancer Institute & Chongqing Cancer Hospital, Chongqing 400030, Chongqing, P.R. China.

*These authors contributed equally to this work

Correspondence: Li Li and Qi Zhou

Li Li

Department of Gynecologic Oncology, Affiliated Tumor Hospital of GuangXi Medical University, Nanning 530021, Guangxi, China. Email: [lili5310430@163.com](mailto:lili5310430@163.com).

Qi Zhou

Department of Gynecologic Oncology, Chongqing University Cancer Hospital & Chongqing Cancer Institute & Chongqing Cancer Hospital, Chongqing 400030, Chongqing, China. Email: [cqzl_zq@163.com](mailto:cqzl_zq@163.com).

**Method details:**

**Primers:**

**For LATS2 cloning:**

F: 5’-CCAAAGACTTTTCCTGCCAC-3’

R: 5’-GTGGCAGGAAAAGTCTTTGG-3’

**For qRT-PCR:**

CD44:

F: 5’-CTGCCGCTTTGCAGGTGTA-3’;

R: 5’-CATTGTGGGCAAGGTGCTATT-3’

CD133:

F: 5’-AGTCGGAAACTGGCAGATAGC-3’;

R: 5’-GGTAGTGTTGTACTGGGCCAAT-3’

ALDH1:

F: 5’-CCGTGGCGTACTATGGATGC-3’;

R: 5’-GCAGCAGACGATCTCTTTCGAT-3’

CTGF:

F: 5’-AAAAGTGCATCCGTACTCCCA-3’;

R: 5’-CCGTCGGTACATACTCCACAG-3’

AREG:

F: 5’-GTGGTGCTGTCGCTCTTGATA-3’;

R: 5’-CCCCAGAAAATGGTTCACGCT-3’

N-cadherin:

F: 5’-AGCCAACCTTAACTGAGGAGT-3’;

R: 5’-GGCAAGTTGATTGGAGGGATG-3’

Vimentin:

F: 5’- TGCCGTTGAAGCTGCTAACTA -3’;

R: 5’- CCAGAGGGAGTGAATCCAGATTA -3’

Snail1:

F: 5’-TCGGAAGCCTAACTACAGCGA-3’;

R: 5’-AGATGAGCATTGGCAGCGAG-3’

ZEB1:

F: 5’-TTACACCTTTGCATACAGAACCC-3’;

R: 5’-TTTACGATTACACCCAGACTGC-3’

E-cadherin:

F: 5’-ATTTTTCCCTCGACACCCGAT-3’;

R: 5’-TCCCAGGCGTAGACCAAGA-3’

ZO-1:

F: 5’-CAACATACAGTGACGCTTCACA-3’;

R: 5’-CACTATTGACGTTTCCCCACTC-3’

GAPDH:

F: 5’-ACAACTTTGGTATCGTGGAAGG-3’;

R: 5’-GCCATCACGCCACAGTTTC-3’

miR-520b:

F: 5’- AAAGTGCTTCCTTTTAGAGGG-3’

R: 5’-CAGTGCGTGTCGTGGAGT-3’

**Antibodies:**

Anti-LATS2 (CST, #5888, 1:1000); Anti-YAP (CST, #14074, 1:1000); Anti-phosphorylated YAP(Abcam, ab76252, 1:10000); Anti-CD44(CST, #37259, 1:1000); Anti-E-cadherin(CST, #3195, 1:1000); Anti-N-cadherin(CST, #13116, 1:1000); Anti-Snail1(CST, #3879, 1:1000); Anti-β-actin(CST, #4970, 1000); Anti-rabbit IgG, HRP-linked Antibody (CST, #7074, 1000).

**Clinical information of patients used in this study**

The clinical information of TCGA data and GEO data can be downloaded from data portal of Genomic Data Commons (GDC, https://gdc-portal.nci.nih.gov/legacy-archive/) and https://www.ncbi.nlm.nih.gov/geo/query/acc.cgi?acc=GSE57897.

**Supplementary Table 1. The clinical information of patients related to Figure 1E.**

| **Characteristics** | **Patients(n=25)** | **%** |
| --- | --- | --- |
| **Age(31-63)** |  |  |
| ≤35 | 3 | 12.0 |
| 35-55 | 18 | 72.0 |
| ＞55 | 4 | 16.0 |
| **TNM Stage** |  |  |
| Ⅰ | 3 | 12.0 |
| Ⅱ | 13 | 52.0 |
| Ⅲ | 7 | 28.0 |
| Ⅳ | 2 | 8.0 |
| **Tumor Type** |  |  |
| Luminal A | 6 | 24.0 |
| Luminal B | 9 | 36.0 |
| Triple Negative | 4 | 16.0 |
| HER2 Type | 5 | 20.0 |

**Supplementary Figures**


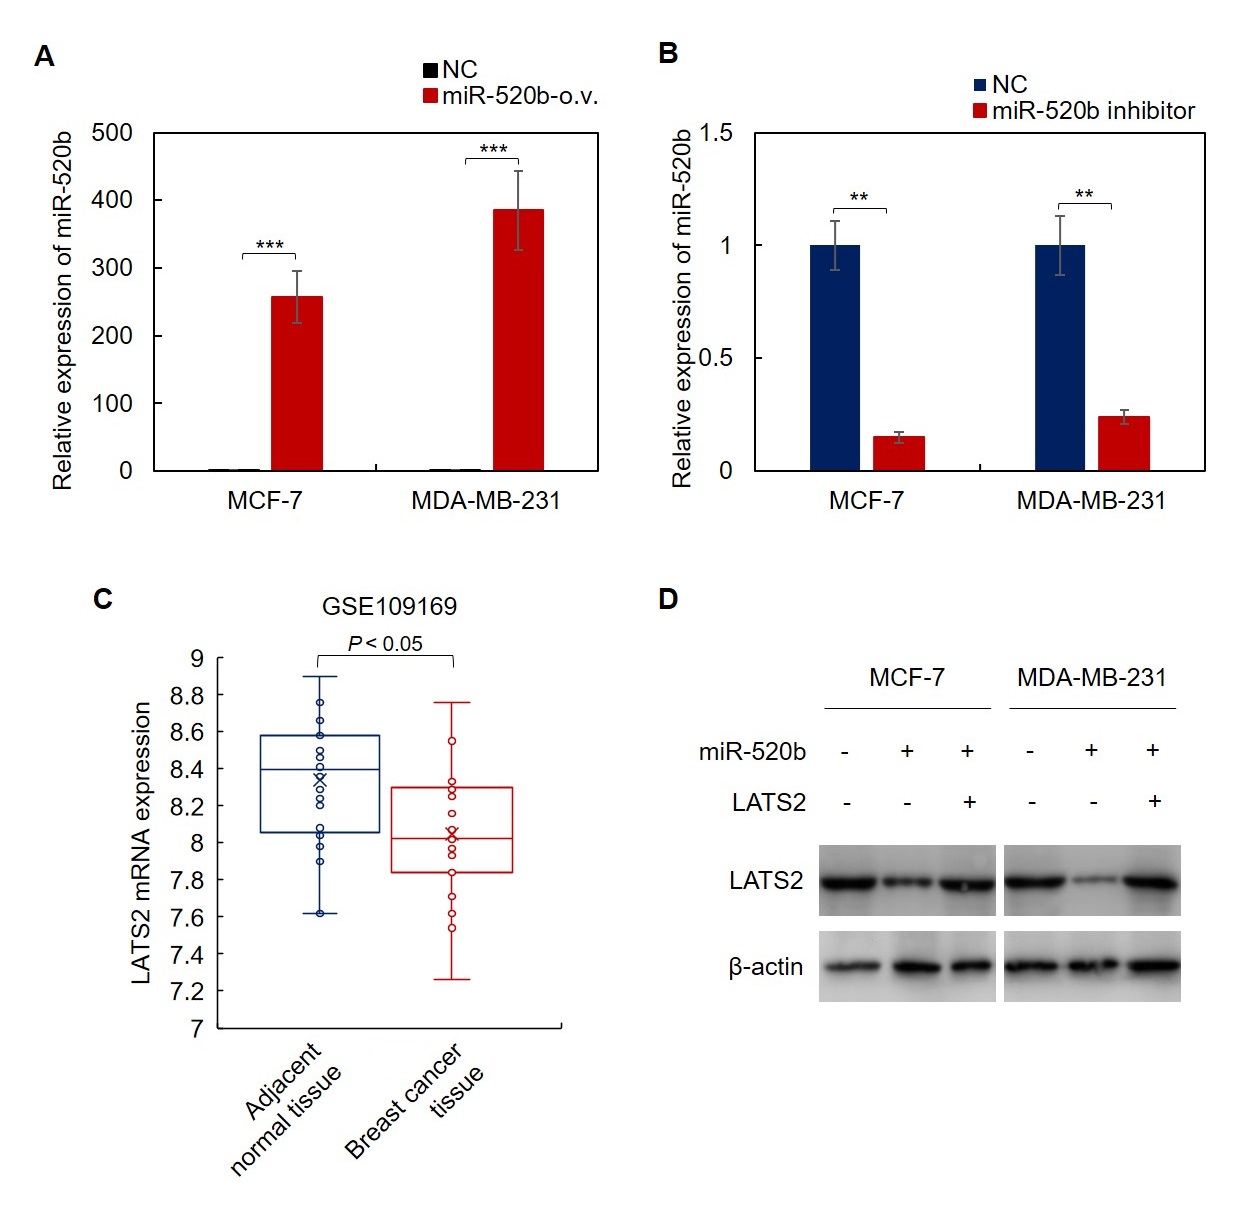


**Supplementary Figure 1**. **(A)** Characterization of miR-520b-overexpressing breast cancer cells. The expression of miR-520b in indicate cells was detected by qRT-PCR. **(B)** Characterization of miR-520-knockdown breast cancer cells. The expression of miR-520b in indicate cells was detected by qRT-PCR. **(C)** LATS2 was downregulated in breast cancer tissues. The expression of LATS2 in breast cancer tissues was analyzed by bioinformatic analysis. **(D)** Characterization of miR-520b-overexperssing LATS2-overexpressing breast cancer cells. The protein levels of LATS2 in indicated cells were analyzed by western blot. Student t test (***P*﹤0.01, ****P*﹤0.001).
